# Supplementary material
Source: publisher figshare collection journal article supplement (https://tandf.figshare.com/ndownloader/files/37568492)
Supplement: Supplementary file 1 [file 37568492]

**Supplementary Figures**


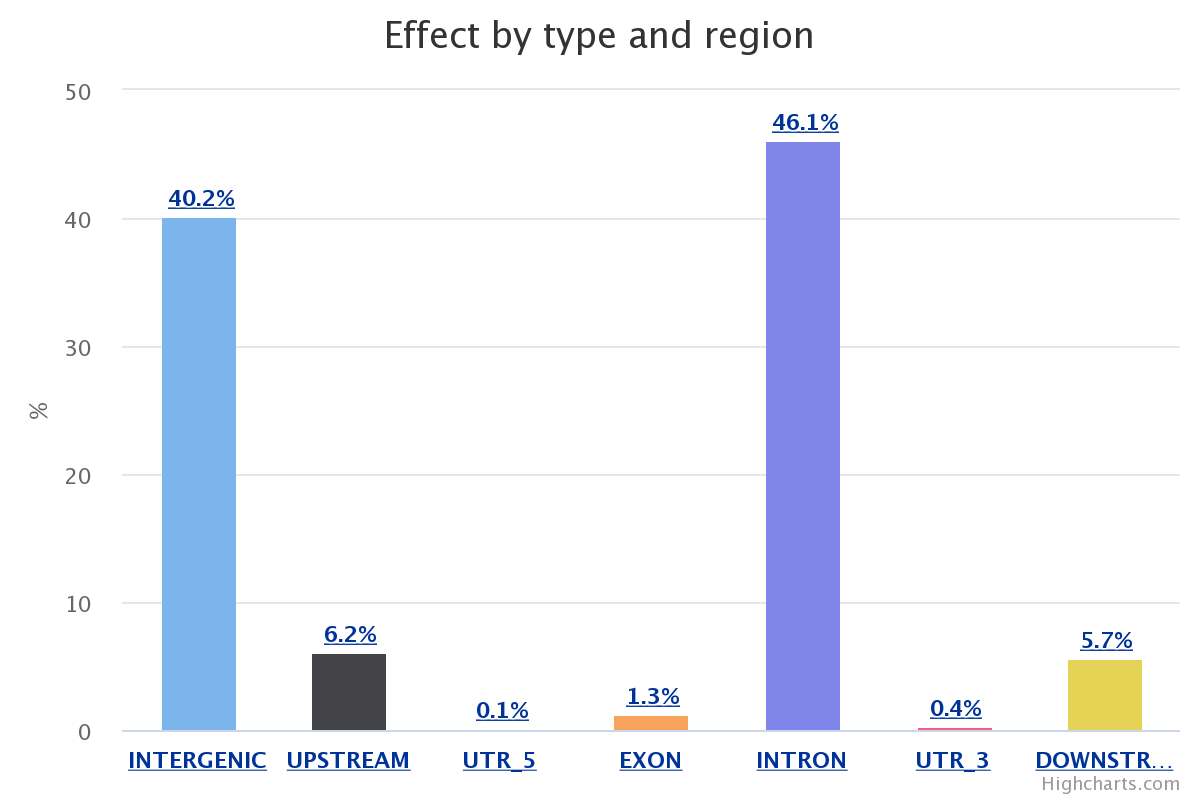

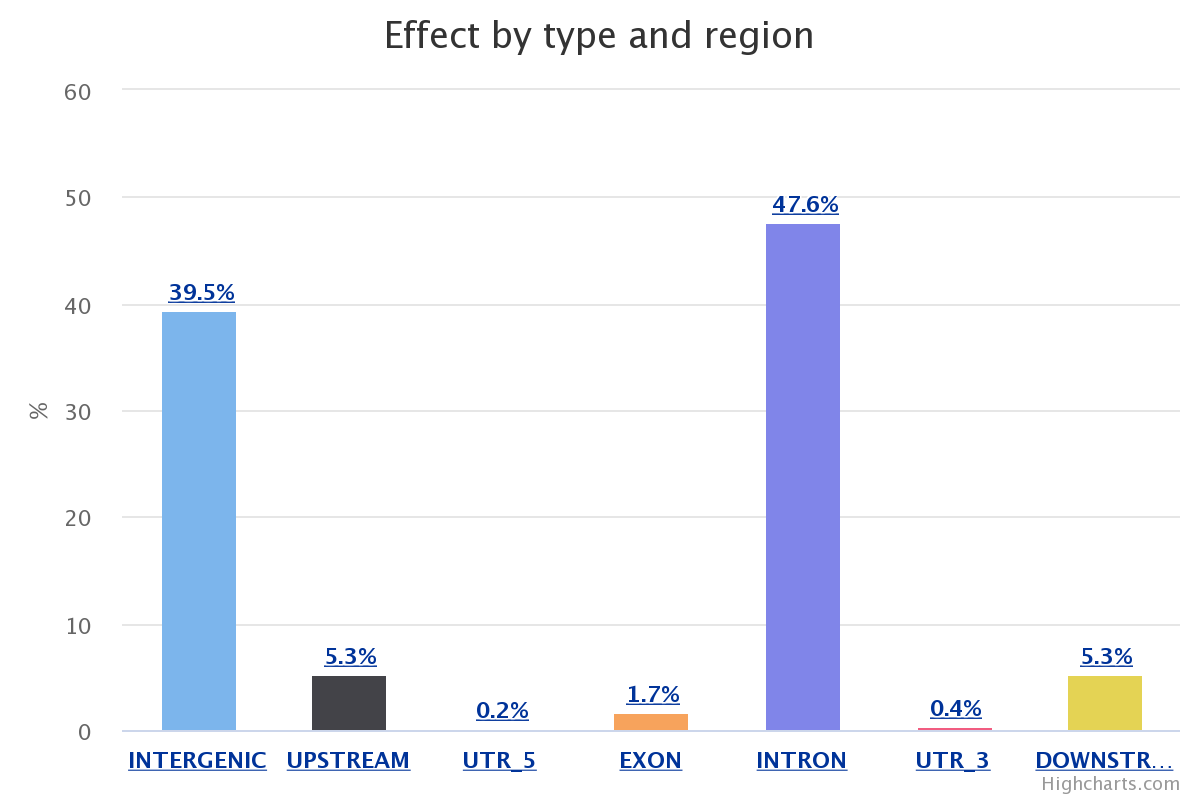


A

B

**Fig1. Region specific count of identified SNPs in Crossbred bull spermatozoa.**

**
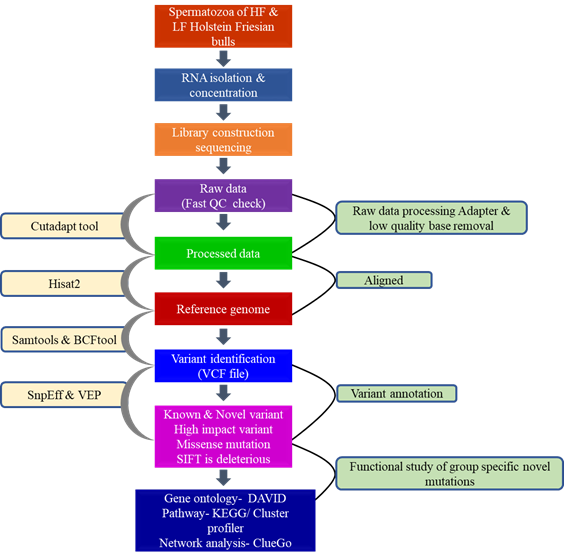
**

**Fig. 2. Sequential and overall Flow of the study**
